# Supplementary material
Source: PubMed Central journal article supplement (PMC4361814)

# Supplemental information

**Figure S1.** ECD of isoaspartic acid

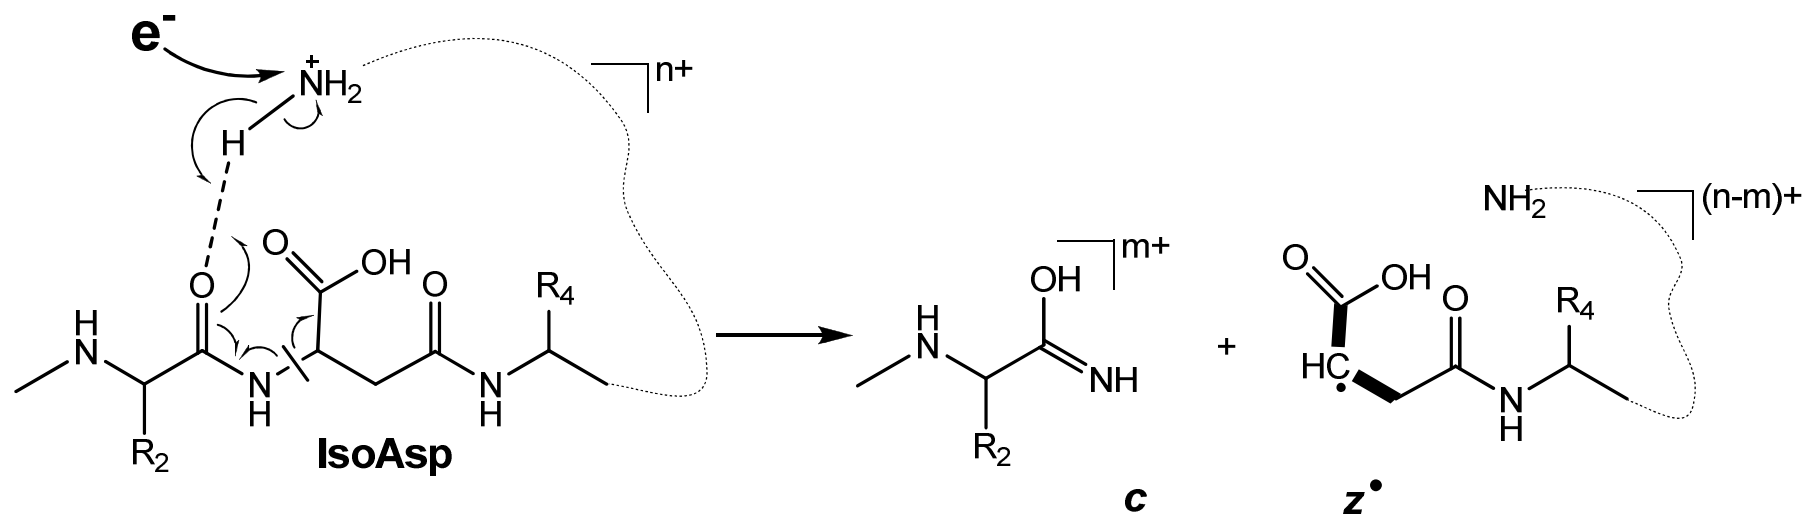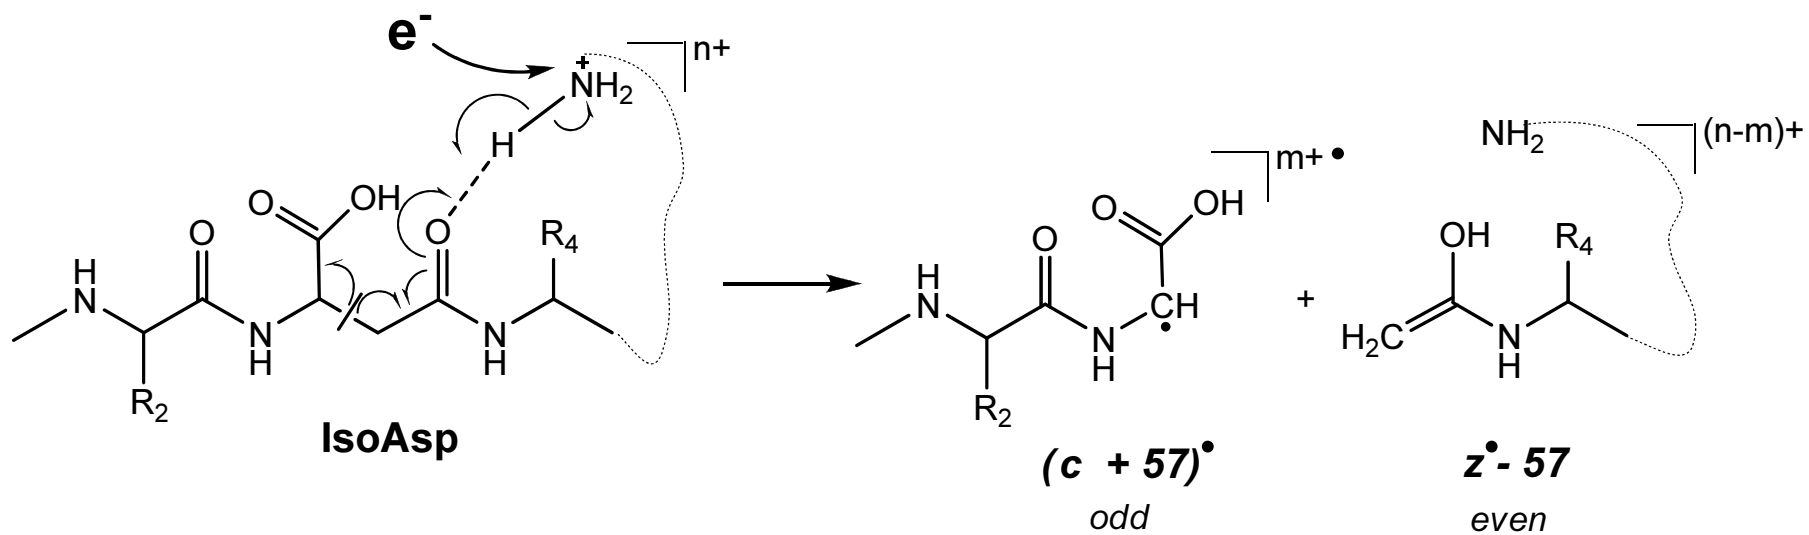

**Figure S2.** Q<sub>06</sub> beta peptide  $\beta_2 V_{\beta_2} A_{\beta_2} L_{\beta_3} V_{\beta_3} A_{\beta_3} L$ : a. ESI, b. IRMPD, c. EID. Asterisk indicates noise peaks.

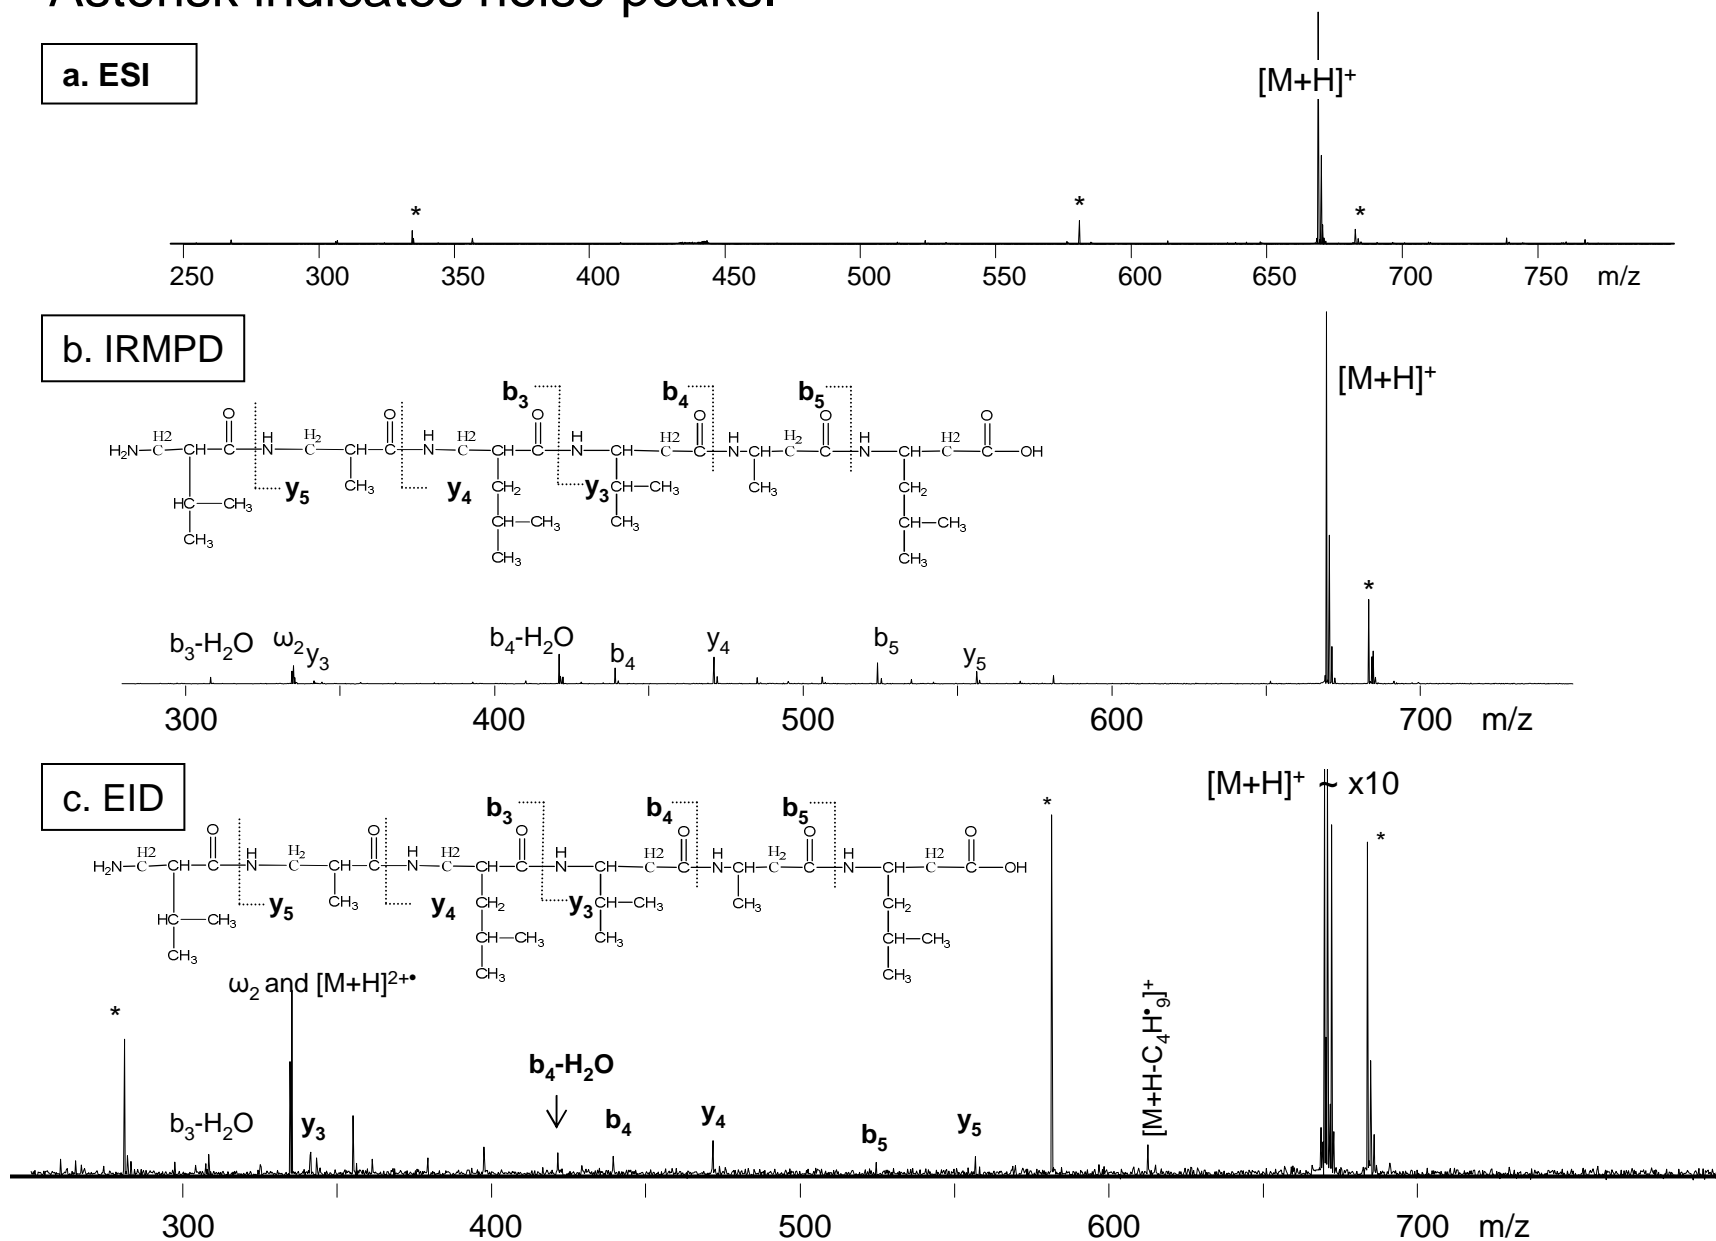

Supplement: NIHMS657955-supplement-supplement_1.pdf [file NIHMS657955-supplement-supplement_1.pdf]
